# Supplementary material for: MiR-218 Impairs Tumor Growth and Increases Chemo-Sensitivity to Cisplatin in Cervical Cancer
Source: Int J Mol Sci. 2012 Nov 28;13(12):16053–64. doi: 10.3390/ijms131216053 (PMC3546678; doi:10.3390/ijms131216053)

## Supplementary Information

**Figure S1.** RT-PCR analysis confirming that miR-218 was overexpressing in HeLa/miR-218 cells.

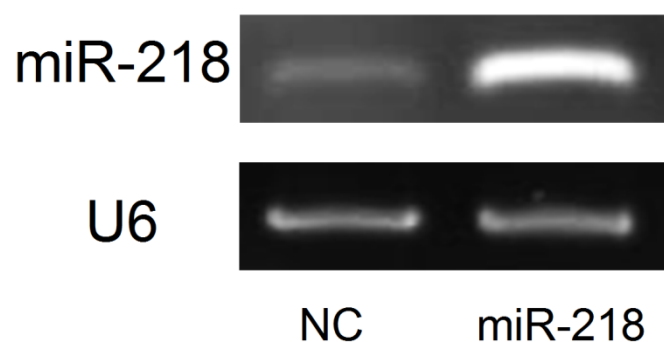

**Figure S2.** Western bolt analysis of Rictor expression in HeLa/miR-218 cells.

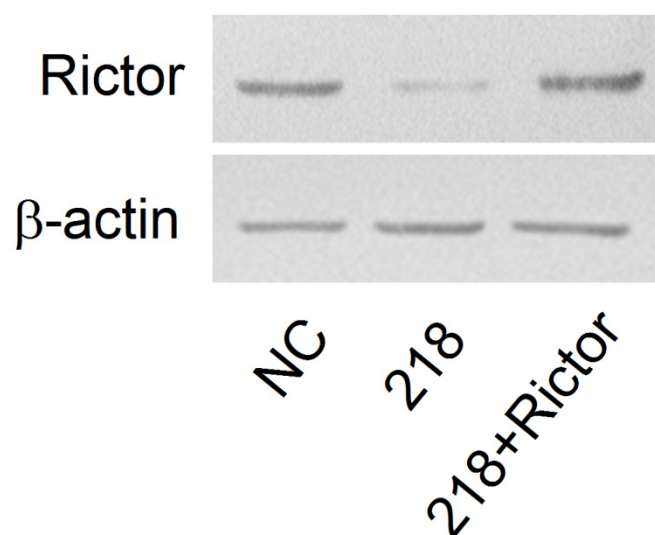

Supplement: Supplementary file 1 [file ijms-13-16053-s001.pdf]
